# Supplementary material
Source: MDPI journal article supplement (https://www.mdpi.com/2073-4433/14/4/748)
Supplement: s1 [file s1]

# Supplementary Materials: Simulation and Estimation of the Inter-Source Category and/or Inter-Pollutant Emission Offset Ratios for a Heavy Industry City

Tu-Fu Chen, Bo-Yan Chen and Ken-Hui Chang \*

Department of Safety, Health and Environmental Engineering, National Yunlin University of Science and Technology, Yunlin 64002, Taiwan; tufu@airlab.yuntech.edu.tw (T.-F.C.); boyan2732@gmail.com (B.-Y.C.)

\* Correspondence: ken@airlab.yuntech.edu.tw

**Table S1.** Selection of CMAQ and WRF configuration options for this study.

| Science Options                        | Configuration                                                  |
|----------------------------------------|----------------------------------------------------------------|
| CMAQ                                   |                                                                |
| Horizontal advection                   | Yamo                                                           |
| Vertical advection                     | WRF omega calculation with the PPM                             |
| Gas-phase chemistry                    | CB05                                                           |
| Numerical solver for chemical kinetics | Euler backward iterative solver                                |
| Horizontal diffusion                   | Multiscale                                                     |
| Vertical diffusion                     | ACM2                                                           |
| Aerosol module                         | AERO6                                                          |
| Cloud module                           | ACM cloud                                                      |
| Deposition velocity module             | M3DRY                                                          |
| Initial condition                      | Default profiles in the CMAQ package                           |
| Boundary condition                     | Default profiles in the CMAQ package                           |
| WRF                                    |                                                                |
| Microphysics                           | WSM 5-Class                                                    |
| Cumulus scheme                         | Kain-Fritsch (new Eta)                                         |
| Planetary boundary layer               | YSU                                                            |
| Radiation                              | CAM                                                            |
| Land surface model                     | NOAH Land-Surface Model                                        |
| 4D data assimilation                   | Grid nudging                                                   |
| Initialization                         | NCEP FNL (Final) Operational Global Analysis and Forecast Data |
| Boundary condition                     | NCEP FNL (Final) Operational Global Analysis and Forecast Data |

**Table S2.** Quantified error analysis results of the simulated and observed PM<sub>2.5</sub> daily average concentrations at air quality stations in KPAB.

|         | Sim<br>( $\mu\text{g}/\text{m}^3$ ) | Obs<br>( $\mu\text{g}/\text{m}^3$ ) | MFB<br>(%) | MFE<br>(%) | RMSE<br>( $\mu\text{g}/\text{m}^3$ ) | IOA  | Correlation |
|---------|-------------------------------------|-------------------------------------|------------|------------|--------------------------------------|------|-------------|
| January | 53.8                                | 52.4                                | -8.2       | 33.1       | 17.0                                 | 0.73 | 0.71        |
| April   | 37.9                                | 40.3                                | -18.0      | 40.8       | 15.9                                 | 0.67 | 0.56        |
| July    | 20.2                                | 18.8                                | -16.6      | 52.3       | 10.7                                 | 0.68 | 0.56        |
| October | 50.5                                | 43.0                                | 1.1        | 36.9       | 17.7                                 | 0.64 | 0.54        |
| Ave     | 40.6                                | 38.6                                | -10.4      | 40.8       | 15.3                                 | 0.68 | 0.59        |

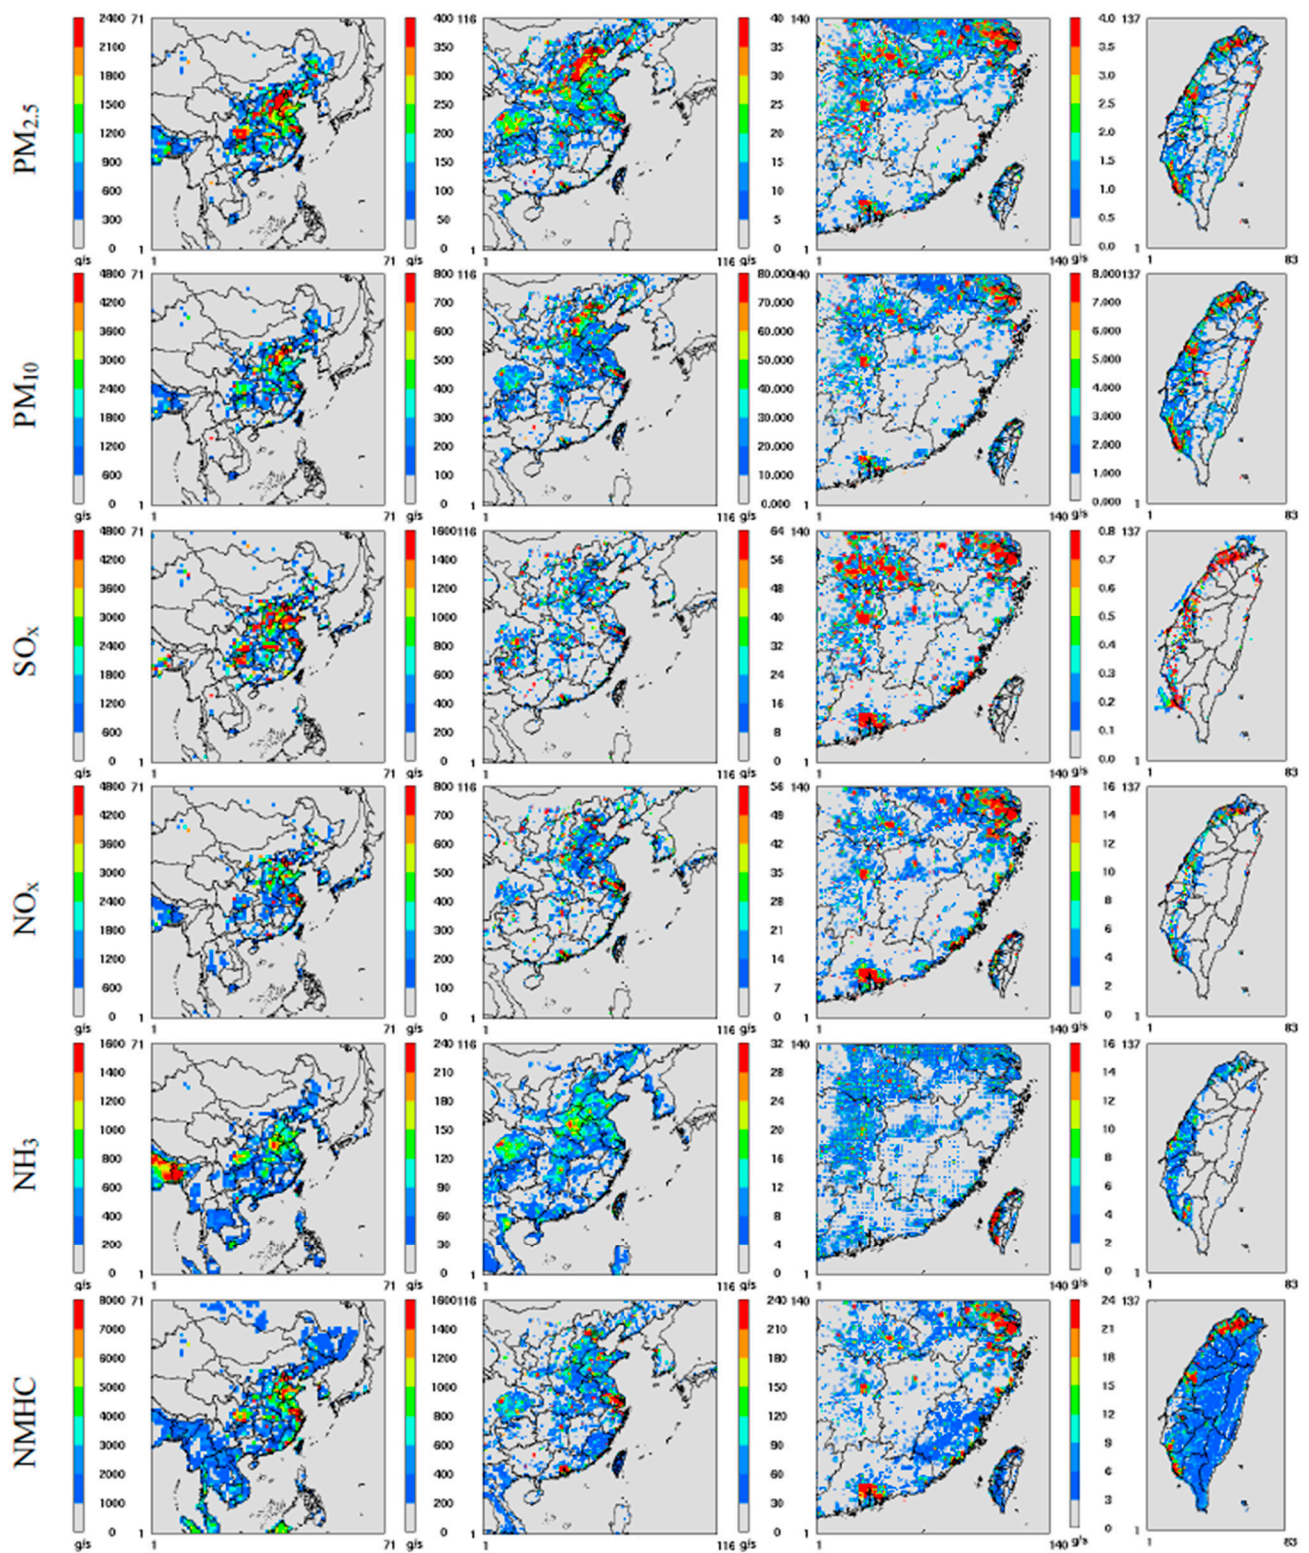

**Figure S1.** Spatial distribution of various pollutant emissions in D1-D4 for the base case in the year of 2013.

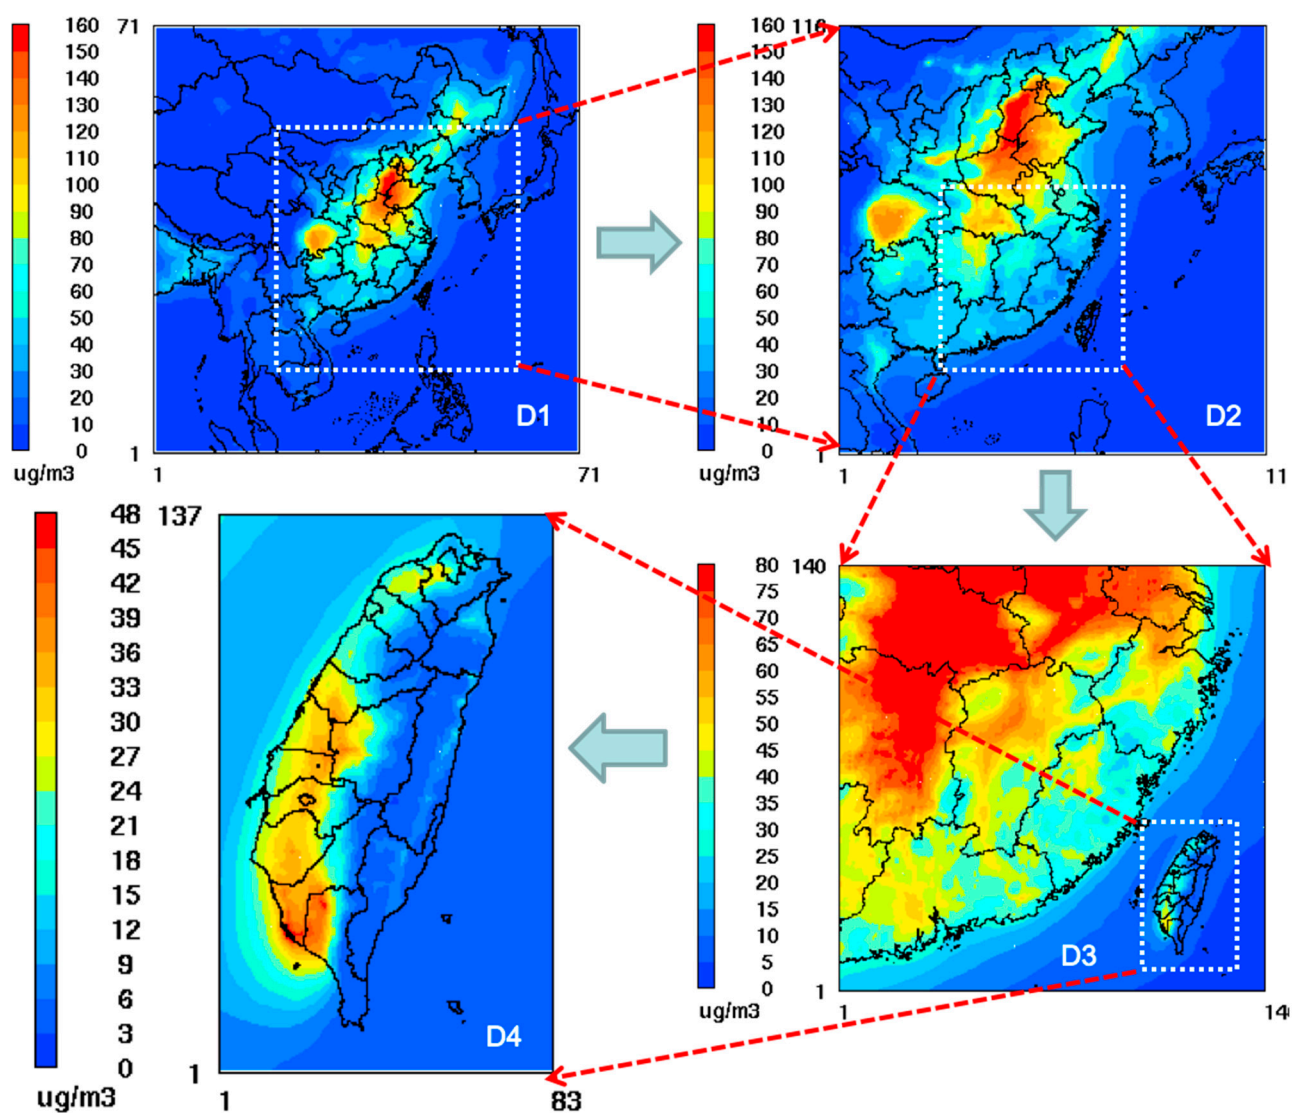

**Figure S2.** Spatial distribution of the annual average concentration ( $\mu\text{g}/\text{m}^3$ , average of January, April, July, and October) of  $\text{PM}_{2.5}$  in D1-D4 for the base case in the year of 2013.
